# Supplementary material for: Dehydration of molybdenum oxide hole extraction layers via microwave annealing for the improvement of efficiency and lifetime in organic solar cells
Source: Royal Society of Chemistry journal article supplement (doi:10.1039/c6tc02259f), 2016-01-01
Supplement: c6tc02259f1.pdf [file c6tc02259f1.pdf]

## Supporting Information

### Dehydration of Molybdenum Oxide Hole Extraction Layers via Microwave Annealing for Efficiency and Lifetime Improvement in Organic Solar Cells

Anastasia Soultati<sup>a,b,\*</sup>, Ioannis Kostis<sup>c</sup>, Panagiotis Argitis<sup>a</sup>, Dimitra Dimotikali<sup>b</sup>, Stella Kennou<sup>d</sup>, Spyros Gardelis<sup>e</sup>, Thanassis Speliotis<sup>a</sup>, Athanassios G. Kontos,<sup>a</sup> Dimitris Davazoglou<sup>a</sup>, Maria Vasilopoulou<sup>a,\*\*</sup>

*<sup>a</sup>Institute of Nanoscience and Nanotechnology (INN), National Centre for Scientific Research*

*“Demokritos”, 15310, Aghia Paraskevi Attikis, Athens, Greece*

*<sup>b</sup>Department of Chemical Engineering, National Technical University of Athens, 15780 Athens, Greece*

*<sup>c</sup>Department of Electronics, Technological Educational Institute (TEI) of Piraeus, 12244 Aegaleo, Greece*

*<sup>d</sup>Department of Chemical Engineering, University of Patras, 26504 Patras, Greece*

*<sup>e</sup>Department of Physics, University of Athens, 15784, Athens, Greece*

*[\\*a.soultati@inn.demokritos.gr](mailto:a.soultati@inn.demokritos.gr), [\\*\\*m.vasilopoulou@inn.demokritos.gr](mailto:m.vasilopoulou@inn.demokritos.gr)*

## Table of Contents

|                                                                                                                         |    |
|-------------------------------------------------------------------------------------------------------------------------|----|
| <b>Table S1</b> Indexing of the various peaks of XRD patterns of Mo oxides.....                                         | S3 |
| <b>Figure S1</b> Tauc plot of the as-deposited and MW-annealed Mo oxide films .....                                     | S4 |
| <b>Figure S2</b> Transmittance spectra of the as-deposited and MW-annealed Mo oxide films .....                         | S4 |
| <b>Figure S3</b> J-V curves of devices with MoO <sub>x</sub> interlayers for different heating powers.....              | S5 |
| <b>Figure S4</b> Absorption spectra of P3HT:PC <sub>71</sub> BM films spin-coated on the different Mo oxide layers..... | S5 |
| <b>Figure S5</b> and <b>Table S2</b> Contact angle measurements .....                                                   | S6 |
| <b>Figure S6</b> Variation of the refractive index of the as-deposited and MW-annealed Mo oxide films.....              | S7 |
| <b>Figure S7</b> Variation of the extinction coefficient of the as-deposited and MW-annealed Mo oxide films ...         | S7 |
| <b>Figure S8</b> Distribution of the normalized optical intensity of incident light within the device .....             | S8 |

**Table S1.** Possible Mo oxides in MoO<sub>x</sub> films and indexing of the various peaks observed in the XRD spectra in Figure 2 b of the main manuscript.

| <b>2θ (degrees)</b> | <b>Possible Compound</b>         | <b>Crystallographic Plane</b>      |
|---------------------|----------------------------------|------------------------------------|
| 23.32               | MoO <sub>3</sub>                 | [1 0 0], [0 2 0], [1 1 0]          |
|                     | Mo <sub>9</sub> O <sub>26</sub>  | [-1 3 1], [-1 1 1]                 |
| 25.07               | Mo <sub>9</sub> O <sub>26</sub>  | [-2 1 1]                           |
| 25.71               | MoO <sub>3</sub>                 | [0 0 2], [0 2 0], [0 4 0], [2 1 0] |
|                     | Mo <sub>9</sub> O <sub>26</sub>  | [-1 1 2]                           |
| 27.32               | MoO <sub>3</sub>                 | [0 1 1], [0 2 1]                   |
|                     | Mo <sub>9</sub> O <sub>26</sub>  | [2 -3 1], [-3 1 0]                 |
|                     | Mo <sub>4</sub> O <sub>11</sub>  | [6 1 0]                            |
|                     | Mo <sub>9</sub> O <sub>23</sub>  | [1 1 2]                            |
|                     | Mo <sub>17</sub> O <sub>47</sub> | [3 2 1]                            |
| 38.99               | MoO <sub>3</sub>                 | [1 0 2], [0 6 0], [0 2 0]          |
| 45.87               | MoO <sub>3</sub>                 | [0 0 8], [2 0 0]                   |
|                     | Mo <sub>9</sub> O <sub>23</sub>  | [1 2 1]                            |
| 49.24               | MoO <sub>3</sub>                 | [0 2 0], [2 2 0], [0 0 2]          |
|                     | Mo <sub>9</sub> O <sub>26</sub>  | [5 1 5]                            |
| 51.48               | Mo <sub>4</sub> O <sub>11</sub>  | [-8 1 3]                           |
| 52.75               | MoO <sub>3</sub>                 | [1 0 -4], [2 1 1], [0 8 0]         |
|                     | Mo <sub>9</sub> O <sub>26</sub>  | [3 2 3]                            |
|                     | Mo <sub>4</sub> O <sub>11</sub>  | [2 3 1]                            |
| 55.16               | MoO <sub>3</sub>                 | [1 2 0], [0 2 2], [1 1 2]          |
|                     | Mo <sub>9</sub> O <sub>23</sub>  | [3 1 6]                            |
|                     | Mo <sub>4</sub> O <sub>11</sub>  | [11 2 1]                           |
| 61.71               | MoO <sub>3</sub>                 | [2 6 0], [4 3 0]                   |

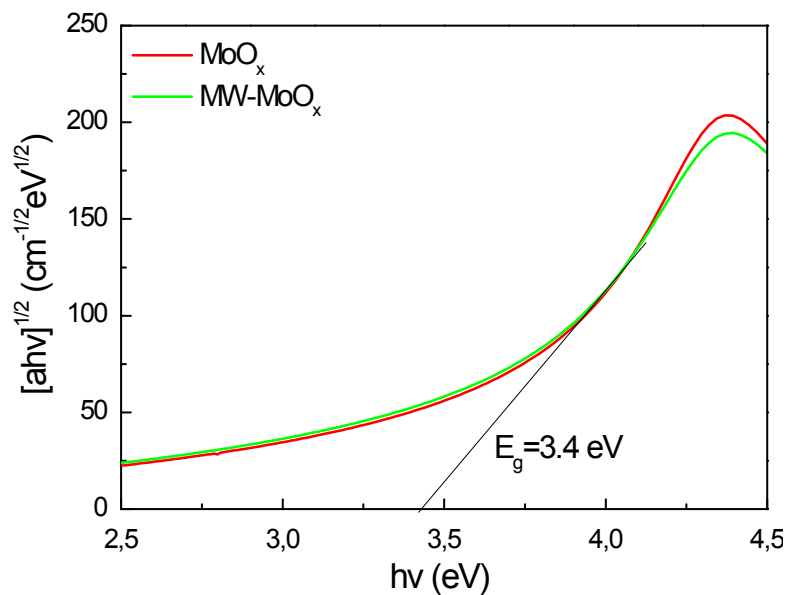

**Figure S1** Tauc plot, as derived from absorption measurements, of 30 nm thick as-deposited hydrogenated under-stoichiometric and the microwave annealed Mo oxide films for the estimation of optical energy band gap.

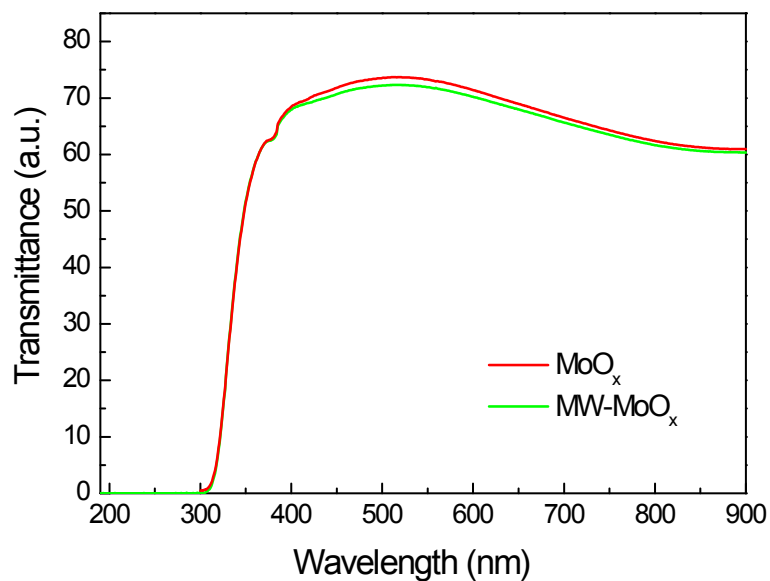

**Figure S2** Transmittance spectra of the as-deposited Mo oxide film and the MW-annealed one deposited on glass/FTO substrates.

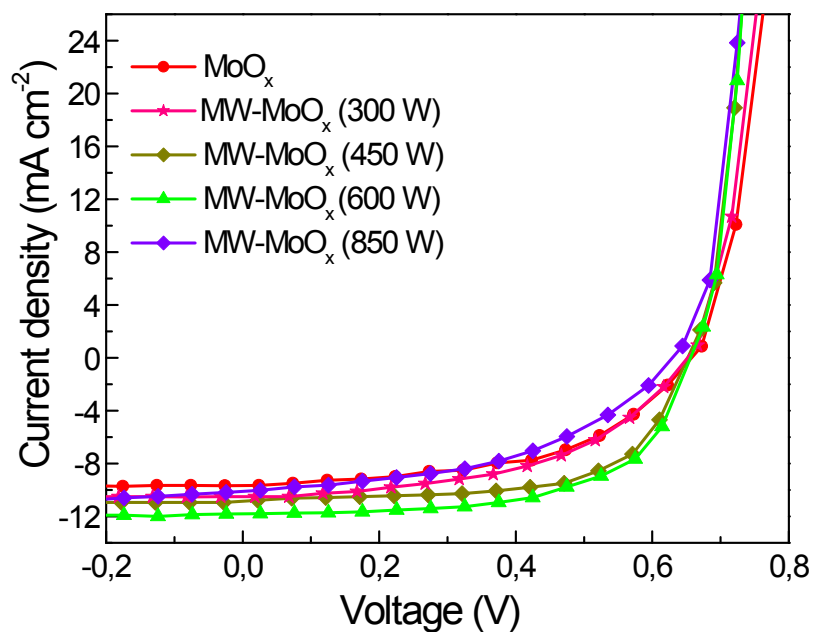

**Figure S3** J-V curves of devices with MoO<sub>x</sub> interlayers for different heating powers.

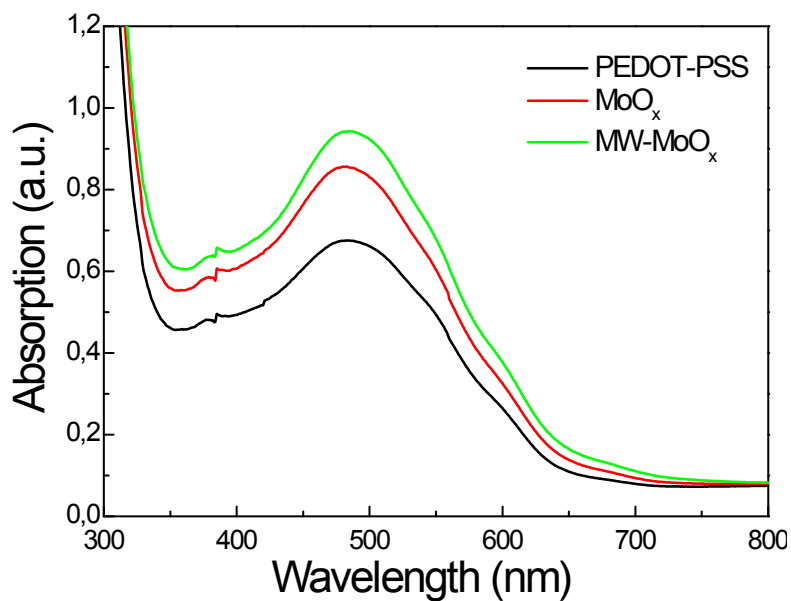

**Figure S4** Absorption spectra of the P3HT:PC<sub>71</sub>BM blend films spin-coated on Mo oxide layers subjected (or not) to microwave annealing after deposition.

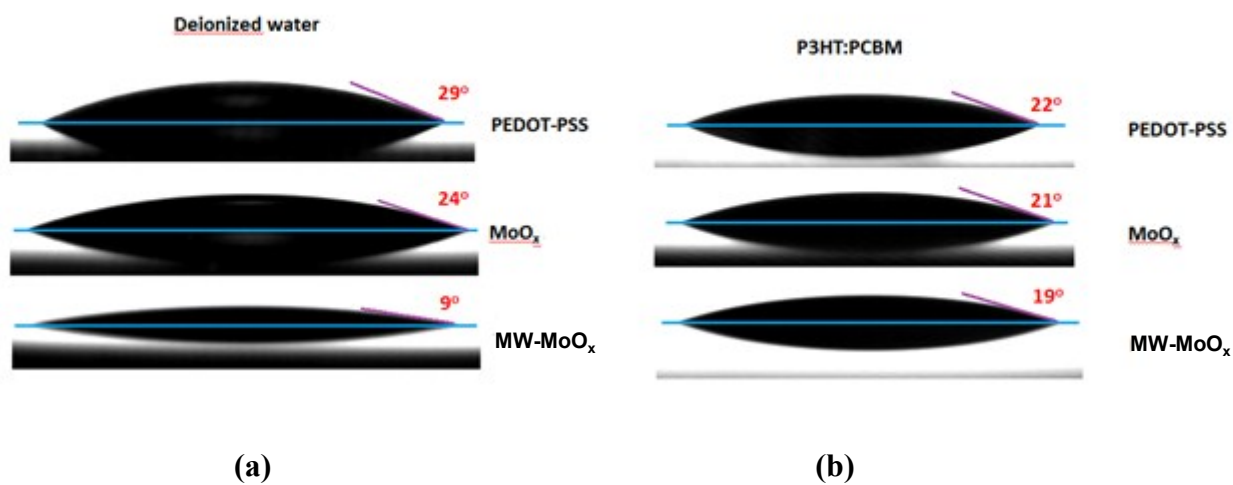

**Figure S5** Measured contact angle between a drop of (a) deionized water and (b) P3HT:PC<sub>71</sub>BM blend and Mo oxide films as deposited or being subjected to microwave annealing.

**Table S2** Polar and non-polar components of surface energies of the PEDOT:SS, Mo oxide and MW-annealed Mo oxide substrates as calculated from contact angle measurements results.

| Substrate                 | $\theta_w$<br>(°) | $\theta_i$<br>(°) | $\gamma_s^p$<br>(mJ/m <sup>2</sup> ) | $\gamma_s^d$<br>(mJ/m <sup>2</sup> ) | $\gamma$<br>(mJ/m <sup>2</sup> ) |
|---------------------------|-------------------|-------------------|--------------------------------------|--------------------------------------|----------------------------------|
| <b>PEDOT:PSS</b>          | 29.0              | 35.4              | 34.5                                 | 31.4                                 | 65.9                             |
| <b>MoO<sub>x</sub></b>    | 24.0              | 14.2              | 32.5                                 | 38.3                                 | 70.8                             |
| <b>MW-MoO<sub>x</sub></b> | 9.0               | 12                | 37.5                                 | 37.9                                 | 75.4                             |

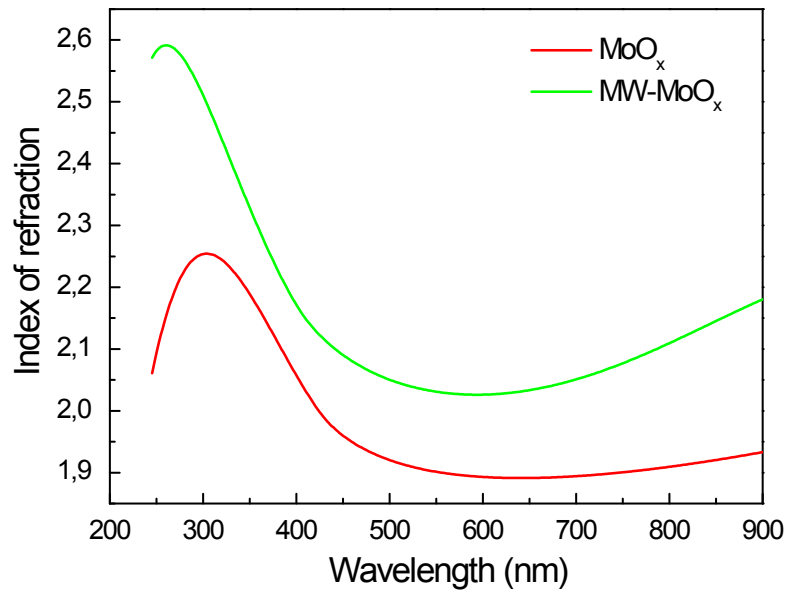

**Figure S6** Variation of the refractive index of MoO<sub>x</sub> and MW-annealed MoO<sub>x</sub> films.

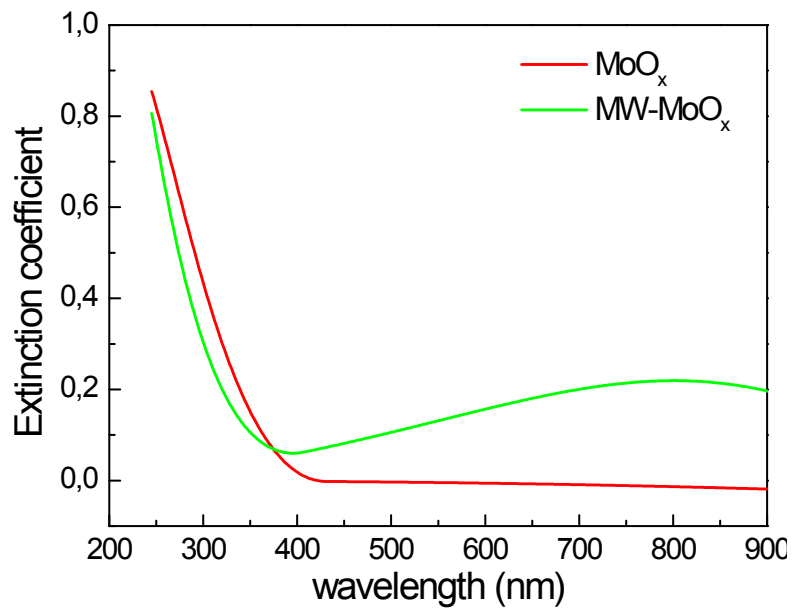

**Figure S7** Variation of the extinction coefficient of MoO<sub>x</sub> and MW-annealed MoO<sub>x</sub> films.

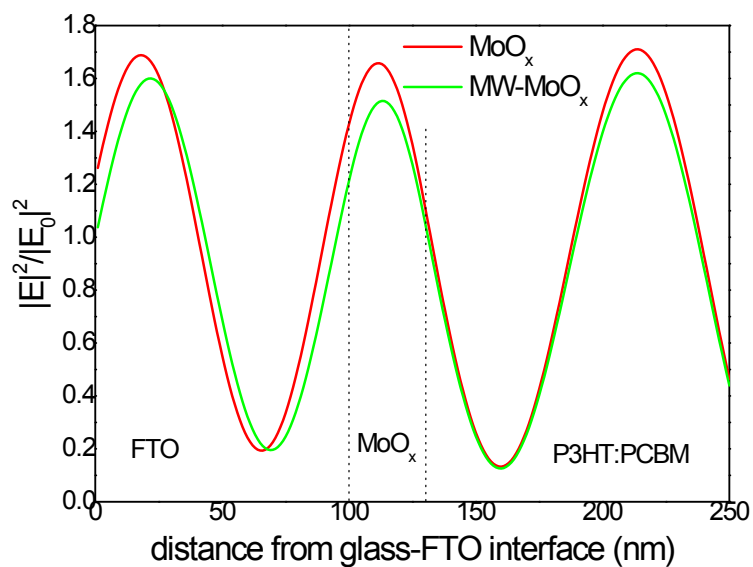

**Figure S8** Distribution of the normalized optical intensity of incident light within the device (estimated for an incident light with a wavelength of 530 nm where the maximum of the photoactive blend absorption occurs).
